# Supplementary material for: Development of a Multidisciplinary Aerodigestive Program: An Institutional Experience
Source: MDPI journal article supplement (doi:10.3390/children8070535), 2021-06-23
Supplement: s1 [file s1]

## Supplementary

**Table S1.** Questionnaire to the patient's caregiver.

---

**How do you think about your child's main aerodigestive symptom improvement after the aerodigestive program?**

☐ Not improved at all ☐ Not improved ☐ Somewhat improved ☐ Improved ☐ Improved very much

---

**Do you think the quality of life of your child has improved after participating in the aerodigestive program?**

☐ Not improved at all ☐ Not improved ☐ Somewhat improved ☐ Improved ☐ Improved very much

**How satisfied is your family with the aerodigestive program?**

☐ Unsatisfied at all ☐ Unsatisfied ☐ Somewhat satisfied ☐ Satisfied ☐ Satisfied very much

**Has the burden of the primary caregiver decreased?**

☐ Not decreased at all ☐ Not decreased ☐ Somewhat decreased ☐ Decreased ☐ Decreased very much

---

**Table S2.** Questionnaire to the ADT members.

---

**Did you know about the name or concept of ADT before participating in ADT?**

☐ Did not know at all ☐ Knew roughly ☐ Knew concretely

---

**Has the practice or treatment policy changed in your field before and after ADT?**

☐ Changed significantly ☐ Somewhat changed ☐ Not changed at all

**Did you increase the amount of time you spend on your patients before and after ADT?**

☐ Increased ☐ Not changed ☐ Decreased

**Do you think the patient's quality of care changed before and after ADT?**

☐ Improved ☐ Not changed ☐ Worsened

**Did your understanding of patients change before and after ADT?**

☐ Improved ☐ Not changed ☐ Worsened

**Has the degree of understanding of the work of medical staff in other fields changed before and after the ADT was implemented?**

☐ Improved ☐ Not changed ☐ Worsened

---

ADT, Aerodigestive team.
